# Supplementary material
Source: publisher figshare collection journal article supplement (https://acs.figshare.com/ndownloader/files/4861387)
Supplement: Supplementary file 1 [file 4861387]

#=======================================================================
data_global
#=======================================================================

_audit_creation_method                   'Jana2006 Version : 15/03/2013'


# 1. PROCESSING SUMMARY (IUCr Office Use Only)

_journal_date_recd_electronic            ?
_journal_date_to_coeditor                ?
_journal_date_from_coeditor              ?
_journal_date_accepted                   ?
_journal_date_printers_first             ?
_journal_date_printers_final             ?
_journal_date_proofs_out                 ?
_journal_date_proofs_in                  ?
_journal_coeditor_name                   ?
_journal_coeditor_code                   ?
_journal_coeditor_notes
; ?
;
_journal_techeditor_code                 ?
_journal_paper_category                  ?
_journal_techeditor_notes
; ?
;
_journal_coden_ASTM                      ?
_journal_name_full                       'Journal of the American Chemical Society'
_journal_year                            ?
_journal_volume                          ?
_journal_issue                           ?
_journal_page_first                      ?
_journal_page_last                       ?
_journal_suppl_publ_number               ?
_journal_suppl_publ_pages                ?

#=======================================================================

# 2. SUBMISSION DETAILS

_publ_contact_author_name                'Tao An'
_publ_contact_author_address
; Nanyang Technological University, School of Materials Science and Engineering,
50 Nanyang Avenue, 639798, Singapore.
;
_publ_contact_author_email               'an-tao@imre.a-star.edu.sg'
_publ_contact_author_fax                 ?
_publ_contact_author_phone               ?

_publ_requested_journal                  'Journal of the American Chemical Society'
_publ_requested_category                 ?

_publ_contact_letter
; ?
;

#=======================================================================

# 3. TITLE AND AUTHOR LIST

_publ_section_title
; Interstitial Oxide Ion Distribution and Transport Mechanism in Aluminum-doped Neodymium Silicate Apatite Electrolytes
;
_publ_section_title_footnote
; ?
;
loop_
 _publ_author_name
 _publ_author_address
'Tao An'
; Nanyang Technological University, School of Materials Science and Engineering,
50 Nanyang Avenue, 639798, Singapore.
;
'Tom Baikie'
; Energy Research Institute @ NTU (ERI@N), Research Technoplaza,
Nanyang Technological University, Nanyang Drive, 637553, Singapore.
;
'Alodia Orera'
; ICMA, CSIC-Universidad de Zaragoza, 50009 Zaragoza, Spain.
;
'Ross O. Piltz'
; Bragg Institute, Australian Science and Technology Organisation,
Lu-cas Heights, NSW 2234, Australia.
;
'Martin Meven'
; RWTH Aachen, Institute of Crystallography and J��lich Centre for Neutron Sciences(JCNS)
 at Heinz Maier-Leibnitz Zentrum (MLZ), Lichtenbergstra?e 1, 85747 Garching, Germany.
;
'Peter R. Slater'
; School of Chemistry, University of Birmingham,
Edgbaston, Birmingham, B15 2TT, UK.
;
'Jun Wei'
; Singapore Institute of Manufacturing Technology (SIMTech), Agency for Science, Technology and Research (A*STAR),
 71 Nanyang Drive, 638075, Singapore.
;
'Mar��a L. Sanju��n'
; ICMA, CSIC-Universidad de Zaragoza, 50009 Zaragoza, Spain.
;
'Tim J. White'
; Nanyang Technological University, School of Materials Science and Engineering,
50 Nanyang Avenue, 639798, Singapore.
;

#=======================================================================

# 4. TEXT

_publ_section_references
;
Petricek, V., Dusek, M. & Palatinus L. (2006). Jana2006.
Structure Determination Software Programs.
Institute of Physics, Praha, Czech Republic.

Palatinus L. & Chapuis G. (2007). J. Appl. Cryst. 40, 786-790.

Brown, I. D. (1996). J. Appl. Cryst. 29, 479-480.

LaueG:
R. Piltz, Acta Cryst. (2011), A67, C155.

argonne_boxes:
C. Wilkinson, H. W. Khamis, R. F. D. Stansfield and G. J. McIntyre (1988),
J. Appl. Cryst., 21, 471.
;

#=======================================================================
data_I
#=======================================================================

# 5. CHEMICAL DATA

_chemical_name_systematic
; ?
;
_chemical_name_common                    ?
_chemical_formula_moiety                 ?
_chemical_formula_structural             ?
_chemical_formula_analytical             ?
_chemical_formula_iupac                  'Nd9.83 Al1.5 Si4.5 O26'
_chemical_formula_sum                    'Al1.5 Nd9.959 O26 Si4.5'
_chemical_formula_weight                 2019.3
_chemical_melting_point                  'not measured'
_chemical_compound_source                ?
_chemical_absolute_configuration         .

#=======================================================================

# 6. CRYSTAL DATA

_symmetry_cell_setting                   hexagonal
_symmetry_space_group_name_H-M           'P 63/m'
_symmetry_space_group_name_Hall          '-P 6c'
_symmetry_Int_Tables_number              176

loop_
 _symmetry_equiv_pos_site_id
 _symmetry_equiv_pos_as_xyz
 1   x,y,z
 2   -y,x-y,z
 3   -x+y,-x,z
 4   -x,-y,z+1/2
 5   y,-x+y,z+1/2
 6   x-y,x,z+1/2
 7   -x,-y,-z
 8   y,-x+y,-z
 9   x-y,x,-z
 10  x,y,-z+1/2
 11  -y,x-y,-z+1/2
 12  -x+y,-x,-z+1/2

_cell_length_a                           9.5611
_cell_length_b                           9.5611
_cell_length_c                           7.0607
_cell_angle_alpha                        90
_cell_angle_beta                         90
_cell_angle_gamma                        120
_cell_volume                             558.9772

loop_
 _jana_cell_twin_matrix_id
 _jana_cell_twin_volume_fraction
 _jana_cell_twin_matrix_1_1
 _jana_cell_twin_matrix_1_2
 _jana_cell_twin_matrix_1_3
 _jana_cell_twin_matrix_2_1
 _jana_cell_twin_matrix_2_2
 _jana_cell_twin_matrix_2_3
 _jana_cell_twin_matrix_3_1
 _jana_cell_twin_matrix_3_2
 _jana_cell_twin_matrix_3_3
 ? ? ? ? ? ? ? ? ? ? ?
_cell_formula_units_Z                    1

_cell_measurement_reflns_used            1781
_cell_measurement_theta_min              3.79
_cell_measurement_theta_max              41.14
_cell_measurement_temperature            100
_cell_special_details
; ?
;

_exptl_crystal_density_diffrn            5.9968
_exptl_crystal_density_meas              'not measured'
_exptl_crystal_density_method            'not measured'
_exptl_crystal_F_000                     888

_exptl_absorpt_coefficient_mu            0.036
_exptl_crystal_description               'irregular'
_exptl_crystal_size_max                  0.15
_exptl_crystal_size_mid                  0.1
_exptl_crystal_size_min                  0.08
_exptl_crystal_size_rad                  ?
_exptl_crystal_colour                    'violet under sunlight'
_exptl_absorpt_correction_type           'multi-scan'
_exptl_absorpt_process_details           
;'R.H. Blessing, Acta Crystallogr., Sect A 1995, 51, 33-38. '
;
_exptl_absorpt_correction_T_min          ?
_exptl_absorpt_correction_T_max          ?

#=======================================================================

# 7. EXPERIMENTAL DATA

_exptl_special_details                   ?

_diffrn_ambient_temperature              100
_diffrn_source                           'nuclear reactor'
_diffrn_source_details           	 'thermal neutrons, supermirror guides'
_diffrn_source_type              	 
;'OPAL reactor, ANSTO, Lucas Heights, Australia'
;
_diffrn_source_power                     ?
_diffrn_source_voltage                   ?
_diffrn_source_current                   ?
_diffrn_radiation_type                   'neutron'
_diffrn_radiation_source                 ?
_diffrn_radiation_wavelength             0.71069
_diffrn_radiation_monochromator          ?
_diffrn_measurement_device               'Laue image-plate diffractometer'
_diffrn_measurement_device_type          'KOALA'
_diffrn_detector                         ?
_diffrn_detector_area_resol_mean         ?
_diffrn_measurement_method               'Laue'
_diffrn_measurement_specimen_support     ?

_diffrn_reflns_number                    1781
_diffrn_reflns_theta_min                 3.79
_diffrn_reflns_theta_max                 41.14
_diffrn_reflns_theta_full                18.3
_diffrn_measured_fraction_theta_max      0.69
_diffrn_measured_fraction_theta_full     0.79
_diffrn_reflns_av_R_equivalents          0.0423
_diffrn_reflns_av_sigmaI/netI            0.0454
_diffrn_reflns_limit_h_min               -9
_diffrn_reflns_limit_h_max               14
_diffrn_reflns_limit_k_min               0
_diffrn_reflns_limit_k_max               14
_diffrn_reflns_limit_l_min               -12
_diffrn_reflns_limit_l_max               12
_diffrn_reflns_reduction_process         ?

_diffrn_standards_number                 ?
_diffrn_standards_interval_count         ?
_diffrn_standards_interval_time          ?
_diffrn_standards_decay_%                ?
loop_
_diffrn_standard_refln_index_h
_diffrn_standard_refln_index_k
_diffrn_standard_refln_index_l
  ? ? ?

_diffrn_radiation_probe                  neutron

#=======================================================================

# 8. REFINEMENT DATA

_refine_special_details
; ?
;

_reflns_number_total                     916
_reflns_number_gt                        718
_reflns_threshold_expression             'I>3\s(I)'

_refine_ls_structure_factor_coef         Fsqd
_refine_ls_R_factor_gt                   0.0361
_refine_ls_wR_factor_gt                  0.0668
_refine_ls_R_factor_all                  0.0639
_refine_ls_wR_factor_ref                 0.0702
_refine_ls_goodness_of_fit_ref           1.83
_refine_ls_goodness_of_fit_gt            1.99
_refine_ls_restrained_S_gt               ?
_refine_ls_restrained_S_all              ?
_refine_ls_number_reflns                 916
_refine_ls_number_parameters             45
_refine_ls_number_restraints             0
_refine_ls_number_constraints            0
_refine_ls_weighting_scheme              sigma
_refine_ls_weighting_details             'w=1/(\s^2^(I)+0.0004I^2^)'
_refine_ls_hydrogen_treatment            ?
_refine_ls_shift/su_max                  0.0077
_refine_ls_shift/su_mean                 0.0014
_refine_diff_density_max                 1.33
_refine_diff_density_min                 -1.41
_refine_ls_extinction_method
 'B-C type 1 Gaussian isotropic (Becker & Coppens, 1974)'
_refine_ls_extinction_coef               350(50)
_refine_ls_abs_structure_details         ?
_refine_ls_abs_structure_Flack           ?
_refine_ls_abs_structure_Rogers          ?

loop_
 _atom_type_symbol
 _atom_type_scat_length_neutron
 _atom_type_scat_source
 Nd    7.690 International_Tables_Vol_C
 Si    4.149 International_Tables_Vol_C
 Al    3.449 International_Tables_Vol_C
 O     5.803 International_Tables_Vol_C

_computing_data_collection               'MAATEL/ANSTO control program'
_computing_cell_refinement               ?
_computing_data_reduction                
;'argonne_boxes (Wilkinson et al., 1988) & LaueG (Piltz, 2011)'
;
_computing_structure_solution            ?
_computing_structure_refinement          ?
_computing_molecular_graphics            ?
_computing_publication_material          ?

#=======================================================================

# 9. ATOMIC COORDINATES AND DISPLACEMENT PARAMETERS

loop_
 _atom_site_label
 _atom_site_type_symbol
 _atom_site_fract_x
 _atom_site_fract_y
 _atom_site_fract_z
 _atom_site_adp_type
 _atom_site_U_iso_or_equiv
 _atom_site_symmetry_multiplicity
 _atom_site_occupancy
 _atom_site_calc_flag
 _atom_site_refinement_flags
 _atom_site_disorder_assembly
 _atom_site_disorder_group
  Nd1 Nd 0.333333 0.666667 0.00021(8) Uani 0.0073(2) 4 0.990(5) d . . .
  Nd2 Nd 0.00844(6) 0.24124(6) 0.25 Uani 0.00421(16) 6 1 d . . .
  Si Si 0.40164(12) 0.37222(12) 0.25 Uani 0.0048(3) 6 0.75 d . . .
  Al Al 0.40164(12) 0.37222(12) 0.25 Uani 0.0048(3) 6 0.25 d . . .
  O1 O 0.32217(11) 0.48957(11) 0.25 Uani 0.0119(3) 6 1 d . . .
  O2 O 0.60196(10) 0.47190(10) 0.25 Uani 0.0101(3) 6 1 d . . .
  O3 O 0.3481(2) 0.25329(11) 0.06144(14) Uani 0.0104(3) 12 0.910(7) d . . .
  O3' O 0.297(2) 0.2355(12) 0.0859(14) Uani 0.0104(3) 12 0.090(7) d . . .
  O4 O 0 0 0.25 Uani 0.0158(4) 2 1 d . . .

loop_
 _atom_site_aniso_label
 _atom_site_aniso_type_symbol
 _atom_site_aniso_U_11
 _atom_site_aniso_U_22
 _atom_site_aniso_U_33
 _atom_site_aniso_U_12
 _atom_site_aniso_U_13
 _atom_site_aniso_U_23
 Nd1 Nd 0.0091(3) 0.0091(3) 0.0037(3) 0.00457(13) 0 0
 Nd2 Nd 0.0041(2) 0.0035(2) 0.00429(19) 0.00137(17) 0 0
 Si Si 0.0048(4) 0.0045(4) 0.0055(4) 0.0026(3) 0 0
 Al Al 0.0048(4) 0.0045(4) 0.0055(4) 0.0026(3) 0 0
 O1 O 0.0174(4) 0.0103(3) 0.0104(3) 0.0086(3) 0 0
 O2 O 0.0079(3) 0.0063(3) 0.0152(3) 0.0029(3) 0 0
 O3 O 0.0153(6) 0.0097(3) 0.0077(3) 0.0073(3) -0.0046(3) -0.0015(2)
 O3' O 0.0153(6) 0.0097(3) 0.0077(3) 0.0073(3) -0.0046(3) -0.0015(2)
 O4 O 0.0082(4) 0.0082(4) 0.0310(9) 0.0041(2) 0 0

loop_
 _jana_atom_site_ADP_C_label
 _jana_atom_site_ADP_C_type_symbol
 _jana_atom_site_ADP_C_111
 _jana_atom_site_ADP_C_112
 _jana_atom_site_ADP_C_113
 _jana_atom_site_ADP_C_122
 _jana_atom_site_ADP_C_123
 _jana_atom_site_ADP_C_133
 _jana_atom_site_ADP_C_222
 _jana_atom_site_ADP_C_223
 _jana_atom_site_ADP_C_233
 _jana_atom_site_ADP_C_333
 ? ? ? ? ? ? ? ? ? ? ? ?

loop_
 _jana_atom_site_ADP_D_label
 _jana_atom_site_ADP_D_type_symbol
 _jana_atom_site_ADP_D_1111
 _jana_atom_site_ADP_D_1112
 _jana_atom_site_ADP_D_1113
 _jana_atom_site_ADP_D_1122
 _jana_atom_site_ADP_D_1123
 _jana_atom_site_ADP_D_1133
 _jana_atom_site_ADP_D_1222
 _jana_atom_site_ADP_D_1223
 _jana_atom_site_ADP_D_1233
 _jana_atom_site_ADP_D_1333
 _jana_atom_site_ADP_D_2222
 _jana_atom_site_ADP_D_2223
 _jana_atom_site_ADP_D_2233
 _jana_atom_site_ADP_D_2333
 _jana_atom_site_ADP_D_3333
 ? ? ? ? ? ? ? ? ? ? ? ? ? ? ? ? ?

loop_
 _jana_atom_site_ADP_E_label
 _jana_atom_site_ADP_E_type_symbol
 _jana_atom_site_ADP_E_11111
 _jana_atom_site_ADP_E_11112
 _jana_atom_site_ADP_E_11113
 _jana_atom_site_ADP_E_11122
 _jana_atom_site_ADP_E_11123
 _jana_atom_site_ADP_E_11133
 _jana_atom_site_ADP_E_11222
 _jana_atom_site_ADP_E_11223
 _jana_atom_site_ADP_E_11233
 _jana_atom_site_ADP_E_11333
 _jana_atom_site_ADP_E_12222
 _jana_atom_site_ADP_E_12223
 _jana_atom_site_ADP_E_12233
 _jana_atom_site_ADP_E_12333
 _jana_atom_site_ADP_E_13333
 _jana_atom_site_ADP_E_22222
 _jana_atom_site_ADP_E_22223
 _jana_atom_site_ADP_E_22233
 _jana_atom_site_ADP_E_22333
 _jana_atom_site_ADP_E_23333
 _jana_atom_site_ADP_E_33333
 ? ? ? ? ? ? ? ? ? ? ? ? ? ? ? ? ? ? ? ? ? ? ?

loop_
 _jana_atom_site_ADP_F_label
 _jana_atom_site_ADP_F_type_symbol
 _jana_atom_site_ADP_F_111111
 _jana_atom_site_ADP_F_111112
 _jana_atom_site_ADP_F_111113
 _jana_atom_site_ADP_F_111122
 _jana_atom_site_ADP_F_111123
 _jana_atom_site_ADP_F_111133
 _jana_atom_site_ADP_F_111222
 _jana_atom_site_ADP_F_111223
 _jana_atom_site_ADP_F_111233
 _jana_atom_site_ADP_F_111333
 _jana_atom_site_ADP_F_112222
 _jana_atom_site_ADP_F_112223
 _jana_atom_site_ADP_F_112233
 _jana_atom_site_ADP_F_112333
 _jana_atom_site_ADP_F_113333
 _jana_atom_site_ADP_F_122222
 _jana_atom_site_ADP_F_122223
 _jana_atom_site_ADP_F_122233
 _jana_atom_site_ADP_F_122333
 _jana_atom_site_ADP_F_123333
 _jana_atom_site_ADP_F_133333
 _jana_atom_site_ADP_F_222222
 _jana_atom_site_ADP_F_222223
 _jana_atom_site_ADP_F_222233
 _jana_atom_site_ADP_F_222333
 _jana_atom_site_ADP_F_223333
 _jana_atom_site_ADP_F_233333
 _jana_atom_site_ADP_F_333333
 ? ? ? ? ? ? ? ? ? ? ? ? ? ? ? ? ? ? ? ? ? ? ? ? ? ? ? ? ? ?


#=======================================================================

# 10. MOLECULAR GEOMETRY


loop_
 _geom_bond_atom_site_label_1
 _geom_bond_atom_site_label_2
 _geom_bond_site_symmetry_1
 _geom_bond_site_symmetry_2
 _geom_bond_distance
 _geom_bond_publ_flag
  Nd1 O1 . . 2.4100(9) ?
  Nd1 O1 . 2_665 2.4100(7) ?
  Nd1 O1 . 3_565 2.4100(11) ?
  Nd1 O2 . 4_664 2.4655(9) ?
  Nd1 O2 . 5_564 2.4655(8) ?
  Nd1 O2 . 6_554 2.4655(10) ?
  Nd1 O3 . 7_665 2.779(2) ?
  Nd1 O3 . 8_565 2.779(2) ?
  Nd1 O3 . 9_555 2.7786(17) ?
  Nd2 O1 . . 2.7410(9) ?
  Nd2 O2 . 3_565 2.4466(15) ?
  Nd2 O3 . 2_555 2.5478(10) ?
  Nd2 O3 . 6_555 2.3912(11) ?
  Nd2 O3 . 9_555 2.3912(11) ?
  Nd2 O3 . 11_555 2.5478(10) ?
  Nd2 O3' . 2_555 2.394(10) ?
  Nd2 O3' . 6_555 2.428(10) ?
  Nd2 O3' . 9_555 2.428(10) ?
  Nd2 O3' . 11_555 2.394(10) ?
  Nd2 O4 . . 2.2672(6) ?
  Si Al . . 0 ?
  Si O1 . . 1.6399(19) ?
  Si O2 . . 1.6587(13) ?
  Si O3 . . 1.6569(11) ?
  Si O3 . 10_555 1.6569(11) ?
  Si O3' . . 1.657(10) ?
  Si O3' . 10_555 1.657(10) ?
  Al O1 . . 1.6399(19) ?
  Al O2 . . 1.6587(13) ?
  Al O3 . . 1.6569(11) ?
  Al O3 . 10_555 1.6569(11) ?
  Al O3' . . 1.657(10) ?
  Al O3' . 10_555 1.657(10) ?
  O1 O1 . 2_665 2.8447(15) ?
  O1 O1 . 3_565 2.845(2) ?
  O1 O2 . . 2.7635(16) ?
  O1 O3 . . 2.7383(18) ?
  O1 O3 . 6_555 2.9068(16) ?
  O1 O3 . 9_555 2.9068(16) ?
  O1 O3 . 10_555 2.7383(18) ?
  O1 O3' . . 2.590(13) ?
  O1 O3' . 10_555 2.590(13) ?
  O2 O2 . 2_655 2.9788(16) ?
  O2 O2 . 3_665 2.9788(18) ?
  O2 O3 . . 2.6380(14) ?
  O2 O3 . 3_665 2.8548(19) ?
  O2 O3 . 10_555 2.6380(14) ?
  O2 O3 . 12_665 2.8548(19) ?
  O2 O3' . . 2.894(13) ?
  O2 O3' . 10_555 2.894(13) ?
  O3 O3 . 10_555 2.6627(14) ?
  O3 O3' . . 0.466(17) ?
  O3 O3' . 8_555 2.84(2) ?
  O3 O3' . 10_555 2.527(10) ?
  O3' O3' . 8_555 2.86(2) ?
  O3' O3' . 9_555 2.86(3) ?
  O3' O3' . 10_555 2.317(14) ?
  O3' O4 . . 2.841(13) ?

loop_
 _geom_angle_atom_site_label_1
 _geom_angle_atom_site_label_2
 _geom_angle_atom_site_label_3
 _geom_angle_site_symmetry_1
 _geom_angle_site_symmetry_2
 _geom_angle_site_symmetry_3
 _geom_angle
 _geom_angle_publ_flag
  O1 Nd1 O1 . . 2_665 72.34(3) ?
  O1 Nd1 O1 . . 3_565 72.34(4) ?
  O1 Nd1 O2 . . 4_664 94.69(3) ?
  O1 Nd1 O2 . . 5_564 153.61(3) ?
  O1 Nd1 O2 . . 6_554 126.56(2) ?
  O1 Nd1 O3 . . 7_665 88.03(3) ?
  O1 Nd1 O3 . . 8_565 139.25(4) ?
  O1 Nd1 O3 . . 9_555 67.71(4) ?
  O1 Nd1 O1 2_665 . 3_565 72.34(3) ?
  O1 Nd1 O2 2_665 . 4_664 126.56(4) ?
  O1 Nd1 O2 2_665 . 5_564 94.69(2) ?
  O1 Nd1 O2 2_665 . 6_554 153.61(4) ?
  O1 Nd1 O3 2_665 . 7_665 67.71(3) ?
  O1 Nd1 O3 2_665 . 8_565 88.03(4) ?
  O1 Nd1 O3 2_665 . 9_555 139.25(4) ?
  O1 Nd1 O2 3_565 . 4_664 153.61(2) ?
  O1 Nd1 O2 3_565 . 5_564 126.56(4) ?
  O1 Nd1 O2 3_565 . 6_554 94.69(3) ?
  O1 Nd1 O3 3_565 . 7_665 139.25(4) ?
  O1 Nd1 O3 3_565 . 8_565 67.71(3) ?
  O1 Nd1 O3 3_565 . 9_555 88.03(5) ?
  O2 Nd1 O2 4_664 . 5_564 74.33(3) ?
  O2 Nd1 O2 4_664 . 6_554 74.33(4) ?
  O2 Nd1 O3 4_664 . 7_665 60.05(3) ?
  O2 Nd1 O3 4_664 . 8_565 125.09(3) ?
  O2 Nd1 O3 4_664 . 9_555 65.65(5) ?
  O2 Nd1 O2 5_564 . 6_554 74.33(3) ?
  O2 Nd1 O3 5_564 . 7_665 65.65(4) ?
  O2 Nd1 O3 5_564 . 8_565 60.05(4) ?
  O2 Nd1 O3 5_564 . 9_555 125.09(3) ?
  O2 Nd1 O3 6_554 . 7_665 125.09(4) ?
  O2 Nd1 O3 6_554 . 8_565 65.65(3) ?
  O2 Nd1 O3 6_554 . 9_555 60.05(5) ?
  O3 Nd1 O3 7_665 . 8_565 117.59(3) ?
  O3 Nd1 O3 7_665 . 9_555 117.59(6) ?
  O3 Nd1 O3 8_565 . 9_555 117.59(6) ?
  O1 Nd2 O2 . . 3_565 99.34(4) ?
  O1 Nd2 O3 . . 2_555 145.56(3) ?
  O1 Nd2 O3 . . 6_555 68.61(4) ?
  O1 Nd2 O3 . . 9_555 68.61(4) ?
  O1 Nd2 O3 . . 11_555 145.56(3) ?
  O1 Nd2 O3' . . 2_555 150.9(3) ?
  O1 Nd2 O3' . . 6_555 78.1(4) ?
  O1 Nd2 O3' . . 9_555 78.1(4) ?
  O1 Nd2 O3' . . 11_555 150.9(3) ?
  O1 Nd2 O4 . . . 110.37(4) ?
  O2 Nd2 O3 3_565 . 2_555 69.69(6) ?
  O2 Nd2 O3 3_565 . 6_555 85.14(7) ?
  O2 Nd2 O3 3_565 . 9_555 85.14(7) ?
  O2 Nd2 O3 3_565 . 11_555 69.69(6) ?
  O2 Nd2 O3' 3_565 . 2_555 79.0(5) ?
  O2 Nd2 O3' 3_565 . 6_555 89.0(6) ?
  O2 Nd2 O3' 3_565 . 9_555 89.0(6) ?
  O2 Nd2 O3' 3_565 . 11_555 79.0(5) ?
  O2 Nd2 O4 3_565 . . 150.28(3) ?
  O3 Nd2 O3 2_555 . 6_555 138.58(7) ?
  O3 Nd2 O3 2_555 . 9_555 77.80(5) ?
  O3 Nd2 O3 2_555 . 11_555 63.01(3) ?
  O3 Nd2 O3' 2_555 . 2_555 10.2(5) ?
  O3 Nd2 O3' 2_555 . 6_555 132.1(5) ?
  O3 Nd2 O3' 2_555 . 9_555 69.5(4) ?
  O3 Nd2 O3' 2_555 . 11_555 61.4(2) ?
  O3 Nd2 O4 2_555 . . 85.15(6) ?
  O3 Nd2 O3 6_555 . 9_555 133.74(6) ?
  O3 Nd2 O3 6_555 . 11_555 77.80(5) ?
  O3 Nd2 O3' 6_555 . 2_555 139.2(3) ?
  O3 Nd2 O3' 6_555 . 6_555 11.1(4) ?
  O3 Nd2 O3' 6_555 . 9_555 144.6(3) ?
  O3 Nd2 O3' 6_555 . 11_555 82.3(3) ?
  O3 Nd2 O4 6_555 . . 105.29(6) ?
  O3 Nd2 O3 9_555 . 11_555 138.58(7) ?
  O3 Nd2 O3' 9_555 . 2_555 82.3(3) ?
  O3 Nd2 O3' 9_555 . 6_555 144.6(3) ?
  O3 Nd2 O3' 9_555 . 9_555 11.1(4) ?
  O3 Nd2 O3' 9_555 . 11_555 139.2(3) ?
  O3 Nd2 O4 9_555 . . 105.29(6) ?
  O3 Nd2 O3' 11_555 . 2_555 61.4(2) ?
  O3 Nd2 O3' 11_555 . 6_555 69.5(4) ?
  O3 Nd2 O3' 11_555 . 9_555 132.1(5) ?
  O3 Nd2 O3' 11_555 . 11_555 10.2(5) ?
  O3 Nd2 O4 11_555 . . 85.15(6) ?
  O3' Nd2 O3' 2_555 . 6_555 130.6(5) ?
  O3' Nd2 O3' 2_555 . 9_555 72.9(5) ?
  O3' Nd2 O3' 2_555 . 11_555 57.9(3) ?
  O3' Nd2 O4 2_555 . . 75.0(6) ?
  O3' Nd2 O3' 6_555 . 9_555 155.4(5) ?
  O3' Nd2 O3' 6_555 . 11_555 72.9(5) ?
  O3' Nd2 O4 6_555 . . 96.9(5) ?
  O3' Nd2 O3' 9_555 . 11_555 130.6(5) ?
  O3' Nd2 O4 9_555 . . 96.9(5) ?
  O3' Nd2 O4 11_555 . . 75.0(6) ?
  Al Si O1 . . . 0 ?
  Al Si O2 . . . 0 ?
  Al Si O3 . . . 0 ?
  Al Si O3 . . 10_555 0 ?
  Al Si O3' . . . 0 ?
  Al Si O3' . . 10_555 0 ?
  O1 Si O2 . . . 113.81(7) ?
  O1 Si O3 . . . 112.32(9) ?
  O1 Si O3 . . 10_555 112.32(9) ?
  O1 Si O3' . . . 103.6(7) ?
  O1 Si O3' . . 10_555 103.6(7) ?
  O2 Si O3 . . . 105.43(9) ?
  O2 Si O3 . . 10_555 105.43(9) ?
  O2 Si O3' . . . 121.6(6) ?
  O2 Si O3' . . 10_555 121.6(6) ?
  O3 Si O3 . . 10_555 106.94(7) ?
  O3 Si O3' . . . 16.2(6) ?
  O3 Si O3' . . 10_555 99.4(3) ?
  O3 Si O3' 10_555 . . 99.4(3) ?
  O3 Si O3' 10_555 . 10_555 16.2(6) ?
  O3' Si O3' . . 10_555 88.7(5) ?
  Si Al O1 . . . 0 ?
  Si Al O2 . . . 0 ?
  Si Al O3 . . . 0 ?
  Si Al O3 . . 10_555 0 ?
  Si Al O3' . . . 0 ?
  Si Al O3' . . 10_555 0 ?
  O1 Al O2 . . . 113.81(7) ?
  O1 Al O3 . . . 112.32(9) ?
  O1 Al O3 . . 10_555 112.32(9) ?
  O1 Al O3' . . . 103.6(7) ?
  O1 Al O3' . . 10_555 103.6(7) ?
  O2 Al O3 . . . 105.43(9) ?
  O2 Al O3 . . 10_555 105.43(9) ?
  O2 Al O3' . . . 121.6(6) ?
  O2 Al O3' . . 10_555 121.6(6) ?
  O3 Al O3 . . 10_555 106.94(7) ?
  O3 Al O3' . . . 16.2(6) ?
  O3 Al O3' . . 10_555 99.4(3) ?
  O3 Al O3' 10_555 . . 99.4(3) ?
  O3 Al O3' 10_555 . 10_555 16.2(6) ?
  O3' Al O3' . . 10_555 88.7(5) ?
  Nd1 O1 Nd1 . . 10_555 94.08(4) ?
  Nd1 O1 Nd2 . . . 104.68(3) ?
  Nd1 O1 Si . . . 127.43(3) ?
  Nd1 O1 Al . . . 127.43(3) ?
  Nd1 O1 O1 . . 2_665 53.83(2) ?
  Nd1 O1 O1 . . 3_565 53.83(3) ?
  Nd1 O1 O2 . . . 109.80(3) ?
  Nd1 O1 O3 . . . 103.49(3) ?
  Nd1 O1 O3 . . 6_555 129.84(7) ?
  Nd1 O1 O3 . . 9_555 62.19(4) ?
  Nd1 O1 O3 . . 10_555 160.90(5) ?
  Nd1 O1 O3' . . . 106.4(2) ?
  Nd1 O1 O3' . . 10_555 159.5(2) ?
  Nd1 O1 Nd2 10_555 . . 104.68(3) ?
  Nd1 O1 Si 10_555 . . 127.43(3) ?
  Nd1 O1 Al 10_555 . . 127.43(3) ?
  Nd1 O1 O1 10_555 . 2_665 53.83(2) ?
  Nd1 O1 O1 10_555 . 3_565 53.83(3) ?
  Nd1 O1 O2 10_555 . . 109.80(3) ?
  Nd1 O1 O3 10_555 . . 160.90(5) ?
  Nd1 O1 O3 10_555 . 6_555 62.19(4) ?
  Nd1 O1 O3 10_555 . 9_555 129.84(7) ?
  Nd1 O1 O3 10_555 . 10_555 103.49(3) ?
  Nd1 O1 O3' 10_555 . . 159.5(2) ?
  Nd1 O1 O3' 10_555 . 10_555 106.4(2) ?
  Nd2 O1 Si . . . 95.05(5) ?
  Nd2 O1 Al . . . 95.05(5) ?
  Nd2 O1 O1 . . 2_665 141.83(6) ?
  Nd2 O1 O1 . . 3_565 81.83(4) ?
  Nd2 O1 O2 . . . 128.36(5) ?
  Nd2 O1 O3 . . . 78.27(4) ?
  Nd2 O1 O3 . . 6_555 49.99(3) ?
  Nd2 O1 O3 . . 9_555 49.99(3) ?
  Nd2 O1 O3 . . 10_555 78.27(4) ?
  Nd2 O1 O3' . . . 68.8(4) ?
  Nd2 O1 O3' . . 10_555 68.8(4) ?
  Si O1 Al . . . 0.0(5) ?
  Si O1 O1 . . 2_665 123.11(6) ?
  Si O1 O1 . . 3_565 176.89(5) ?
  Si O1 O2 . . . 33.31(4) ?
  Si O1 O3 . . . 34.04(4) ?
  Si O1 O3 . . 6_555 100.15(6) ?
  Si O1 O3 . . 9_555 100.15(6) ?
  Si O1 O3 . . 10_555 34.04(4) ?
  Si O1 O3' . . . 38.5(4) ?
  Si O1 O3' . . 10_555 38.5(4) ?
  Al O1 O1 . . 2_665 123.11(6) ?
  Al O1 O1 . . 3_565 176.89(5) ?
  Al O1 O2 . . . 33.31(4) ?
  Al O1 O3 . . . 34.04(4) ?
  Al O1 O3 . . 6_555 100.15(6) ?
  Al O1 O3 . . 9_555 100.15(6) ?
  Al O1 O3 . . 10_555 34.04(4) ?
  Al O1 O3' . . . 38.5(4) ?
  Al O1 O3' . . 10_555 38.5(4) ?
  O1 O1 O1 2_665 . 3_565 60.00(4) ?
  O1 O1 O2 2_665 . . 89.81(4) ?
  O1 O1 O3 2_665 . . 133.24(4) ?
  O1 O1 O3 2_665 . 6_555 115.55(5) ?
  O1 O1 O3 2_665 . 9_555 115.55(5) ?
  O1 O1 O3 2_665 . 10_555 133.24(4) ?
  O1 O1 O3' 2_665 . . 142.2(3) ?
  O1 O1 O3' 2_665 . 10_555 142.2(3) ?
  O1 O1 O2 3_565 . . 149.81(4) ?
  O1 O1 O3 3_565 . . 144.33(4) ?
  O1 O1 O3 3_565 . 6_555 77.87(6) ?
  O1 O1 O3 3_565 . 9_555 77.87(6) ?
  O1 O1 O3 3_565 . 10_555 144.33(4) ?
  O1 O1 O3' 3_565 . . 139.3(4) ?
  O1 O1 O3' 3_565 . 10_555 139.3(4) ?
  O2 O1 O3 . . . 57.30(5) ?
  O2 O1 O3 . . 6_555 119.54(6) ?
  O2 O1 O3 . . 9_555 119.54(6) ?
  O2 O1 O3 . . 10_555 57.30(5) ?
  O2 O1 O3' . . . 65.3(4) ?
  O2 O1 O3' . . 10_555 65.3(4) ?
  O3 O1 O3 . . 6_555 109.82(6) ?
  O3 O1 O3 . . 9_555 66.64(7) ?
  O3 O1 O3 . . 10_555 58.18(4) ?
  O3 O1 O3' . . . 9.5(4) ?
  O3 O1 O3' . . 10_555 56.5(3) ?
  O3 O1 O3 6_555 . 9_555 98.31(5) ?
  O3 O1 O3 6_555 . 10_555 66.64(7) ?
  O3 O1 O3' 6_555 . . 101.8(3) ?
  O3 O1 O3' 6_555 . 10_555 61.8(4) ?
  O3 O1 O3 9_555 . 10_555 109.82(6) ?
  O3 O1 O3' 9_555 . . 61.8(4) ?
  O3 O1 O3' 9_555 . 10_555 101.8(3) ?
  O3 O1 O3' 10_555 . . 56.5(3) ?
  O3 O1 O3' 10_555 . 10_555 9.5(4) ?
  O3' O1 O3' . . 10_555 53.1(3) ?
  Nd1 O2 Nd1 4_665 . 7_665 91.54(4) ?
  Nd1 O2 Nd2 4_665 . 2_665 116.52(2) ?
  Nd1 O2 Si 4_665 . . 102.66(4) ?
  Nd1 O2 Al 4_665 . . 102.66(4) ?
  Nd1 O2 O1 4_665 . . 122.92(2) ?
  Nd1 O2 O2 4_665 . 2_655 52.84(2) ?
  Nd1 O2 O2 4_665 . 3_665 52.84(2) ?
  Nd1 O2 O3 4_665 . . 108.33(4) ?
  Nd1 O2 O3 4_665 . 3_665 101.89(6) ?
  Nd1 O2 O3 4_665 . 10_555 65.87(4) ?
  Nd1 O2 O3 4_665 . 12_665 62.46(4) ?
  Nd1 O2 O3' 4_665 . . 107.1(3) ?
  Nd1 O2 O3' 4_665 . 10_555 73.7(3) ?
  Nd1 O2 Nd2 7_665 . 2_665 116.52(2) ?
  Nd1 O2 Si 7_665 . . 102.66(4) ?
  Nd1 O2 Al 7_665 . . 102.66(4) ?
  Nd1 O2 O1 7_665 . . 122.92(2) ?
  Nd1 O2 O2 7_665 . 2_655 52.84(2) ?
  Nd1 O2 O2 7_665 . 3_665 52.84(2) ?
  Nd1 O2 O3 7_665 . . 65.87(4) ?
  Nd1 O2 O3 7_665 . 3_665 62.46(4) ?
  Nd1 O2 O3 7_665 . 10_555 108.33(4) ?
  Nd1 O2 O3 7_665 . 12_665 101.89(6) ?
  Nd1 O2 O3' 7_665 . . 73.7(3) ?
  Nd1 O2 O3' 7_665 . 10_555 107.1(3) ?
  Nd2 O2 Si 2_665 . . 121.90(7) ?
  Nd2 O2 Al 2_665 . . 121.90(7) ?
  Nd2 O2 O1 2_665 . . 89.02(4) ?
  Nd2 O2 O2 2_665 . 2_655 159.80(5) ?
  Nd2 O2 O2 2_665 . 3_665 99.80(3) ?
  Nd2 O2 O3 2_665 . . 134.79(5) ?
  Nd2 O2 O3 2_665 . 3_665 56.82(5) ?
  Nd2 O2 O3 2_665 . 10_555 134.79(5) ?
  Nd2 O2 O3 2_665 . 12_665 56.82(5) ?
  Nd2 O2 O3' 2_665 . . 134.3(3) ?
  Nd2 O2 O3' 2_665 . 10_555 134.3(3) ?
  Si O2 Al . . . 0.0(5) ?
  Si O2 O1 . . . 32.88(5) ?
  Si O2 O2 . . 2_655 78.31(5) ?
  Si O2 O2 . . 3_665 138.31(7) ?
  Si O2 O3 . . . 37.26(5) ?
  Si O2 O3 . . 3_665 151.55(4) ?
  Si O2 O3 . . 10_555 37.26(5) ?
  Si O2 O3 . . 12_665 151.55(4) ?
  Si O2 O3' . . . 29.2(3) ?
  Si O2 O3' . . 10_555 29.2(3) ?
  Al O2 O1 . . . 32.88(5) ?
  Al O2 O2 . . 2_655 78.31(5) ?
  Al O2 O2 . . 3_665 138.31(7) ?
  Al O2 O3 . . . 37.26(5) ?
  Al O2 O3 . . 3_665 151.55(4) ?
  Al O2 O3 . . 10_555 37.26(5) ?
  Al O2 O3 . . 12_665 151.55(4) ?
  Al O2 O3' . . . 29.2(3) ?
  Al O2 O3' . . 10_555 29.2(3) ?
  O1 O2 O2 . . 2_655 111.19(3) ?
  O1 O2 O2 . . 3_665 171.19(4) ?
  O1 O2 O3 . . . 60.87(5) ?
  O1 O2 O3 . . 3_665 133.28(6) ?
  O1 O2 O3 . . 10_555 60.87(5) ?
  O1 O2 O3 . . 12_665 133.28(6) ?
  O1 O2 O3' . . . 54.4(4) ?
  O1 O2 O3' . . 10_555 54.4(4) ?
  O2 O2 O2 2_655 . 3_665 60.00(3) ?
  O2 O2 O3 2_655 . . 60.74(4) ?
  O2 O2 O3 2_655 . 3_665 105.88(6) ?
  O2 O2 O3 2_655 . 10_555 60.74(4) ?
  O2 O2 O3 2_655 . 12_665 105.88(6) ?
  O2 O2 O3' 2_655 . . 63.2(3) ?
  O2 O2 O3' 2_655 . 10_555 63.2(3) ?
  O2 O2 O3 3_665 . . 111.83(6) ?
  O2 O2 O3 3_665 . 3_665 53.72(6) ?
  O2 O2 O3 3_665 . 10_555 111.83(6) ?
  O2 O2 O3 3_665 . 12_665 53.72(6) ?
  O2 O2 O3' 3_665 . . 117.8(4) ?
  O2 O2 O3' 3_665 . 10_555 117.8(4) ?
  O3 O2 O3 . . 3_665 119.80(4) ?
  O3 O2 O3 . . 10_555 60.62(4) ?
  O3 O2 O3 . . 12_665 165.39(8) ?
  O3 O2 O3' . . . 8.1(3) ?
  O3 O2 O3' . . 10_555 54.1(2) ?
  O3 O2 O3 3_665 . 10_555 165.39(8) ?
  O3 O2 O3 3_665 . 12_665 55.60(4) ?
  O3 O2 O3' 3_665 . . 127.4(2) ?
  O3 O2 O3' 3_665 . 10_555 168.9(3) ?
  O3 O2 O3 10_555 . 12_665 119.80(4) ?
  O3 O2 O3' 10_555 . . 54.1(2) ?
  O3 O2 O3' 10_555 . 10_555 8.1(3) ?
  O3 O2 O3' 12_665 . . 168.9(3) ?
  O3 O2 O3' 12_665 . 10_555 127.4(2) ?
  O3' O2 O3' . . 10_555 47.2(3) ?
  Nd1 O3 Nd2 7_665 . 3_555 103.23(7) ?
  Nd1 O3 Nd2 7_665 . 5_554 104.07(5) ?
  Nd1 O3 Si 7_665 . . 90.97(8) ?
  Nd1 O3 Al 7_665 . . 90.97(8) ?
  Nd1 O3 O1 7_665 . . 112.83(4) ?
  Nd1 O3 O1 7_665 . 5_554 50.10(4) ?
  Nd1 O3 O2 7_665 . . 54.08(4) ?
  Nd1 O3 O2 7_665 . 2_655 51.89(4) ?
  Nd1 O3 O3 7_665 . 10_555 99.01(7) ?
  Nd1 O3 O3' 7_665 . . 166.0(16) ?
  Nd1 O3 O3' 7_665 . 8_555 91.0(3) ?
  Nd1 O3 O3' 7_665 . 10_555 108.8(4) ?
  Nd2 O3 Nd2 3_555 . 5_554 116.28(4) ?
  Nd2 O3 Si 3_555 . . 95.03(5) ?
  Nd2 O3 Al 3_555 . . 95.03(5) ?
  Nd2 O3 O1 3_555 . . 112.52(5) ?
  Nd2 O3 O1 3_555 . 5_554 98.73(6) ?
  Nd2 O3 O2 3_555 . . 106.82(5) ?
  Nd2 O3 O2 3_555 . 2_655 53.49(4) ?
  Nd2 O3 O3 3_555 . 10_555 58.50(3) ?
  Nd2 O3 O3' 3_555 . . 65.7(18) ?
  Nd2 O3 O3' 3_555 . 8_555 53.3(2) ?
  Nd2 O3 O3' 3_555 . 10_555 56.3(3) ?
  Nd2 O3 Si 5_554 . . 140.16(11) ?
  Nd2 O3 Al 5_554 . . 140.16(11) ?
  Nd2 O3 O1 5_554 . . 107.66(7) ?
  Nd2 O3 O1 5_554 . 5_554 61.40(4) ?
  Nd2 O3 O2 5_554 . . 135.66(4) ?
  Nd2 O3 O2 5_554 . 2_655 135.74(7) ?
  Nd2 O3 O3 5_554 . 10_555 156.87(11) ?
  Nd2 O3 O3' 5_554 . . 88.9(14) ?
  Nd2 O3 O3' 5_554 . 8_555 69.9(3) ?
  Nd2 O3 O3' 5_554 . 10_555 147.1(4) ?
  Si O3 Al . . . 0.0(5) ?
  Si O3 O1 . . . 33.64(6) ?
  Si O3 O1 . . 5_554 140.72(11) ?
  Si O3 O2 . . . 37.31(5) ?
  Si O3 O2 . . 2_655 82.27(8) ?
  Si O3 O3 . . 10_555 36.53(4) ?
  Si O3 O3' . . . 81.9(12) ?
  Si O3 O3' . . 8_555 147.7(3) ?
  Si O3 O3' . . 10_555 40.3(2) ?
  Al O3 O1 . . . 33.64(6) ?
  Al O3 O1 . . 5_554 140.72(11) ?
  Al O3 O2 . . . 37.31(5) ?
  Al O3 O2 . . 2_655 82.27(8) ?
  Al O3 O3 . . 10_555 36.53(4) ?
  Al O3 O3' . . . 81.9(12) ?
  Al O3 O3' . . 8_555 147.7(3) ?
  Al O3 O3' . . 10_555 40.3(2) ?
  O1 O3 O1 . . 5_554 147.97(4) ?
  O1 O3 O2 . . . 61.83(4) ?
  O1 O3 O2 . . 2_655 115.83(4) ?
  O1 O3 O3 . . 10_555 60.91(5) ?
  O1 O3 O3' . . . 66.8(14) ?
  O1 O3 O3' . . 8_555 155.5(2) ?
  O1 O3 O3' . . 10_555 58.8(3) ?
  O1 O3 O2 5_554 . . 103.41(7) ?
  O1 O3 O2 5_554 . 2_655 76.97(6) ?
  O1 O3 O3 5_554 . 10_555 139.16(10) ?
  O1 O3 O3' 5_554 . . 137.1(12) ?
  O1 O3 O3' 5_554 . 8_555 53.6(2) ?
  O1 O3 O3' 5_554 . 10_555 146.0(4) ?
  O2 O3 O2 . . 2_655 65.55(5) ?
  O2 O3 O3 . . 10_555 59.69(4) ?
  O2 O3 O3' . . . 119.2(12) ?
  O2 O3 O3' . . 8_555 137.4(3) ?
  O2 O3 O3' . . 10_555 68.1(3) ?
  O2 O3 O3 2_655 . 10_555 62.20(6) ?
  O2 O3 O3' 2_655 . . 114.9(18) ?
  O2 O3 O3' 2_655 . 8_555 73.8(3) ?
  O2 O3 O3' 2_655 . 10_555 69.5(5) ?
  O3 O3 O3' 10_555 . . 68.2(14) ?
  O3 O3 O3' 10_555 . 8_555 111.5(2) ?
  O3 O3 O3' 10_555 . 10_555 9.9(4) ?
  O3' O3 O3' . . 8_555 88.7(14) ?
  O3' O3 O3' . . 10_555 58.4(15) ?
  O3' O3 O3' 8_555 . 10_555 109.4(3) ?
  Nd2 O3' Nd2 3_555 . 5_554 121.0(4) ?
  Nd2 O3' Si 3_555 . . 100.9(5) ?
  Nd2 O3' Al 3_555 . . 100.9(5) ?
  Nd2 O3' O1 3_555 . . 123.8(4) ?
  Nd2 O3' O2 3_555 . . 103.5(6) ?
  Nd2 O3' O3 3_555 . . 104(2) ?
  Nd2 O3' O3 3_555 . 9_555 131.1(6) ?
  Nd2 O3' O3 3_555 . 10_555 62.3(3) ?
  Nd2 O3' O3' 3_555 . 8_555 54.1(4) ?
  Nd2 O3' O3' 3_555 . 9_555 124.1(6) ?
  Nd2 O3' O3' 3_555 . 10_555 61.1(4) ?
  Nd2 O3' O4 3_555 . . 50.5(2) ?
  Nd2 O3' Si 5_554 . . 137.2(5) ?
  Nd2 O3' Al 5_554 . . 137.2(5) ?
  Nd2 O3' O1 5_554 . . 111.4(6) ?
  Nd2 O3' O2 5_554 . . 121.9(4) ?
  Nd2 O3' O3 5_554 . . 80.0(13) ?
  Nd2 O3' O3 5_554 . 9_555 57.3(4) ?
  Nd2 O3' O3 5_554 . 10_555 175.9(8) ?
  Nd2 O3' O3' 5_554 . 8_555 68.9(4) ?
  Nd2 O3' O3' 5_554 . 9_555 53.0(4) ?
  Nd2 O3' O3' 5_554 . 10_555 167.7(11) ?
  Nd2 O3' O4 5_554 . . 105.3(5) ?
  Si O3' Al . . . 0.0(5) ?
  Si O3' O1 . . . 38.0(3) ?
  Si O3' O2 . . . 29.2(3) ?
  Si O3' O3 . . . 81.9(13) ?
  Si O3' O3 . . 9_555 102.5(7) ?
  Si O3' O3 . . 10_555 40.3(2) ?
  Si O3' O3' . . 8_555 145.2(10) ?
  Si O3' O3' . . 9_555 111.3(9) ?
  Si O3' O3' . . 10_555 45.6(3) ?
  Si O3' O4 . . . 108.1(5) ?
  Al O3' O1 . . . 38.0(3) ?
  Al O3' O2 . . . 29.2(3) ?
  Al O3' O3 . . . 81.9(13) ?
  Al O3' O3 . . 9_555 102.5(7) ?
  Al O3' O3 . . 10_555 40.3(2) ?
  Al O3' O3' . . 8_555 145.2(10) ?
  Al O3' O3' . . 9_555 111.3(9) ?
  Al O3' O3' . . 10_555 45.6(3) ?
  Al O3' O4 . . . 108.1(5) ?
  O1 O3' O2 . . . 60.2(2) ?
  O1 O3' O3 . . . 103.7(13) ?
  O1 O3' O3 . . 9_555 64.6(4) ?
  O1 O3' O3 . . 10_555 64.7(3) ?
  O1 O3' O3' . . 8_555 174.4(7) ?
  O1 O3' O3' . . 9_555 73.3(6) ?
  O1 O3' O3' . . 10_555 63.4(4) ?
  O1 O3' O4 . . . 98.6(5) ?
  O2 O3' O3 . . . 52.8(11) ?
  O2 O3' O3 . . 9_555 117.5(4) ?
  O2 O3' O3 . . 10_555 57.8(3) ?
  O2 O3' O3' . . 8_555 124.7(8) ?
  O2 O3' O3' . . 9_555 126.8(5) ?
  O2 O3' O3' . . 10_555 66.4(4) ?
  O2 O3' O4 . . . 132.3(4) ?
  O3 O3' O3 . . 9_555 121.3(17) ?
  O3 O3' O3 . . 10_555 101.9(17) ?
  O3 O3' O3' . . 8_555 82.0(16) ?
  O3 O3' O3' . . 9_555 124.2(17) ?
  O3 O3' O3' . . 10_555 111.8(18) ?
  O3 O3' O4 . . . 153(2) ?
  O3 O3' O3 9_555 . 10_555 118.8(6) ?
  O3 O3' O3' 9_555 . 8_555 112.3(5) ?
  O3 O3' O3' 9_555 . 9_555 9.4(3) ?
  O3 O3' O3' 9_555 . 10_555 111.5(8) ?
  O3 O3' O4 9_555 . . 81.4(5) ?
  O3 O3' O3' 10_555 . 8_555 114.9(6) ?
  O3 O3' O3' 10_555 . 9_555 123.4(7) ?
  O3 O3' O3' 10_555 . 10_555 9.9(5) ?
  O3 O3' O4 10_555 . . 74.6(3) ?
  O3' O3' O3' 8_555 . 9_555 103.3(6) ?
  O3' O3' O3' 8_555 . 10_555 115.1(6) ?
  O3' O3' O4 8_555 . . 76.1(3) ?
  O3' O3' O3' 9_555 . 10_555 115.1(9) ?
  O3' O3' O4 9_555 . . 76.1(5) ?
  O3' O3' O4 10_555 . . 65.9(4) ?
  Nd2 O4 Nd2 . . 2_555 120.00(3) ?
  Nd2 O4 Nd2 . . 3_555 120.000(18) ?
  Nd2 O4 O3' . . . 71.3(4) ?
  Nd2 O4 O3' . . 2_555 54.5(4) ?
  Nd2 O4 O3' . . 3_555 154.2(3) ?
  Nd2 O4 O3' . . 10_555 71.3(4) ?
  Nd2 O4 O3' . . 11_555 54.5(4) ?
  Nd2 O4 O3' . . 12_555 154.2(3) ?
  Nd2 O4 Nd2 2_555 . 3_555 120.00(3) ?
  Nd2 O4 O3' 2_555 . . 154.2(2) ?
  Nd2 O4 O3' 2_555 . 2_555 71.3(3) ?
  Nd2 O4 O3' 2_555 . 3_555 54.5(4) ?
  Nd2 O4 O3' 2_555 . 10_555 154.2(2) ?
  Nd2 O4 O3' 2_555 . 11_555 71.3(3) ?
  Nd2 O4 O3' 2_555 . 12_555 54.5(4) ?
  Nd2 O4 O3' 3_555 . . 54.5(4) ?
  Nd2 O4 O3' 3_555 . 2_555 154.2(2) ?
  Nd2 O4 O3' 3_555 . 3_555 71.3(4) ?
  Nd2 O4 O3' 3_555 . 10_555 54.5(4) ?
  Nd2 O4 O3' 3_555 . 11_555 154.2(2) ?
  Nd2 O4 O3' 3_555 . 12_555 71.3(4) ?
  O3' O4 O3' . . 2_555 104.5(4) ?
  O3' O4 O3' . . 3_555 104.5(4) ?
  O3' O4 O3' . . 10_555 48.1(3) ?
  O3' O4 O3' . . 11_555 125.7(5) ?
  O3' O4 O3' . . 12_555 125.7(6) ?
  O3' O4 O3' 2_555 . 3_555 104.5(6) ?
  O3' O4 O3' 2_555 . 10_555 125.7(5) ?
  O3' O4 O3' 2_555 . 11_555 48.1(3) ?
  O3' O4 O3' 2_555 . 12_555 125.7(5) ?
  O3' O4 O3' 3_555 . 10_555 125.7(6) ?
  O3' O4 O3' 3_555 . 11_555 125.7(5) ?
  O3' O4 O3' 3_555 . 12_555 48.1(3) ?
  O3' O4 O3' 10_555 . 11_555 104.5(4) ?
  O3' O4 O3' 10_555 . 12_555 104.5(4) ?
  O3' O4 O3' 11_555 . 12_555 104.5(6) ?

loop_
 _geom_torsion_atom_site_label_1
 _geom_torsion_atom_site_label_2
 _geom_torsion_atom_site_label_3
 _geom_torsion_atom_site_label_4
 _geom_torsion_site_symmetry_1
 _geom_torsion_site_symmetry_2
 _geom_torsion_site_symmetry_3
 _geom_torsion_site_symmetry_4
 _geom_torsion
 _geom_torsion_publ_flag
 ? ? ? ? ? ? ? ? ? ?

loop_
 _geom_hbond_atom_site_label_D
 _geom_hbond_atom_site_label_H
 _geom_hbond_atom_site_label_A
 _geom_hbond_site_symmetry_D
 _geom_hbond_site_symmetry_H
 _geom_hbond_site_symmetry_A
 _geom_hbond_distance_DH
 _geom_hbond_distance_HA
 _geom_hbond_distance_DA
 _geom_hbond_angle_DHA
 _geom_hbond_publ_flag
 ? ? ? ? ? ? ? ? ? ? ?
